# Supplementary material for: Artificial Intelligence-Powered Whole-Slide Image Analyzer Reveals a Distinctive Distribution of Tumor-Infiltrating Lymphocytes in Neuroendocrine Neoplasms
Source: Diagnostics (Basel). 2022 Sep 27;12(10):2340. doi: 10.3390/diagnostics12102340 (PMC9600129; doi:10.3390/diagnostics12102340)

**Supplementary Table S1. Number of annotated cells in the training and validation sets.**

|            | <b>Lymphocyte</b> | <b>Tumor cell</b> |
|------------|-------------------|-------------------|
| Training   | 465,778           | 1,644,697         |
| Validation | 150,041           | 567,781           |

**Supplementary Table S2. Area of annotated tissues in the training and validation sets.**

|            | Area (mm <sup>2</sup> ) |              |            |
|------------|-------------------------|--------------|------------|
|            | Tumor Area              | Tumor Stroma | Background |
| Training   | 7,861                   | 5,693        | 18,505     |
| Validation | 600                     | 421          | 983        |

**Supplementary Figure S1. Intratumoral tumor-infiltrating lymphocytes (TIL) density in high-grade NENs and low/intermediate-grade NENs according to the primary origin. (A) Colorectum (B) Small intestine (C) Hepatopancreatobiliary (D) Stomach (E) Lung (F) Other organs. Values in graph indicates *P* values.**

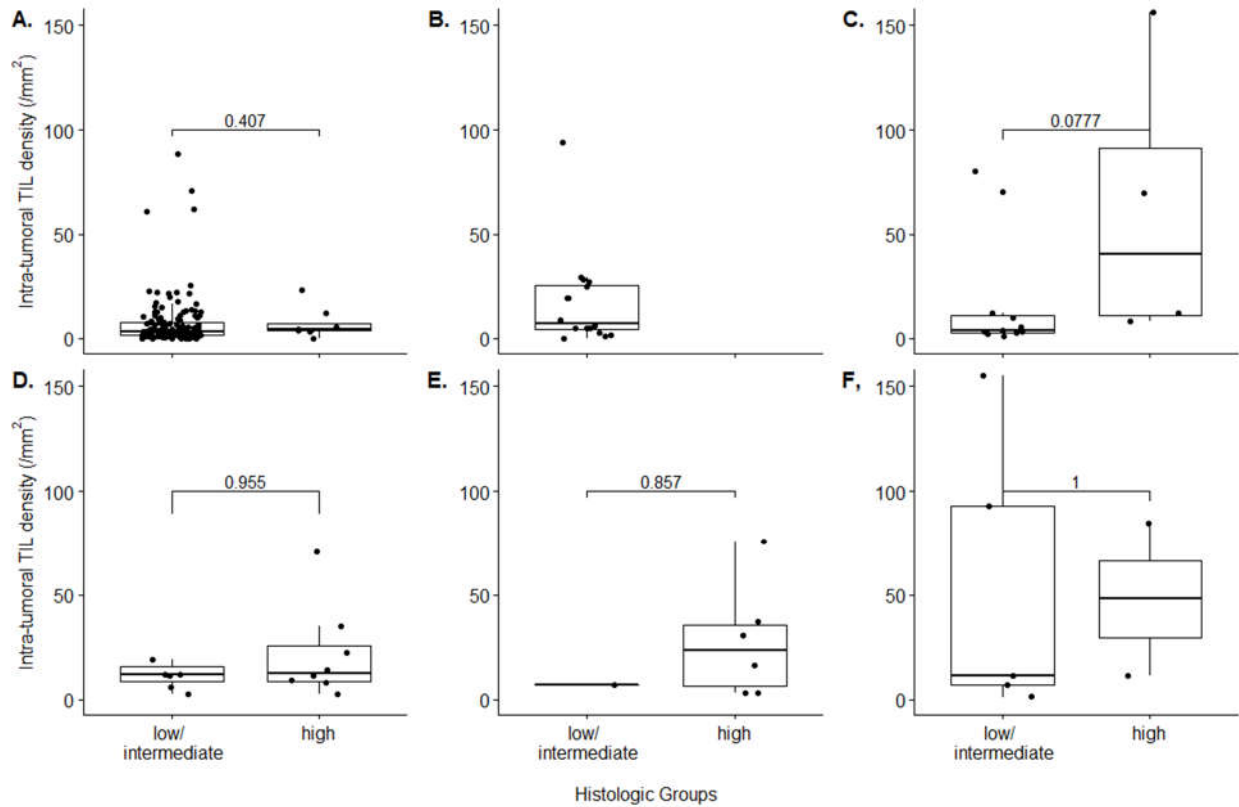

**Supplementary Figure S2. PD-L1 combined positive score (CPS) in high-grade NENs and low/intermediate-grade NENs according to the primary origin. (A) Colorectum (B) Small intestine (C) Hepatopancreatobiliary (D) Stomach (E) Lung (F) Other organs.**

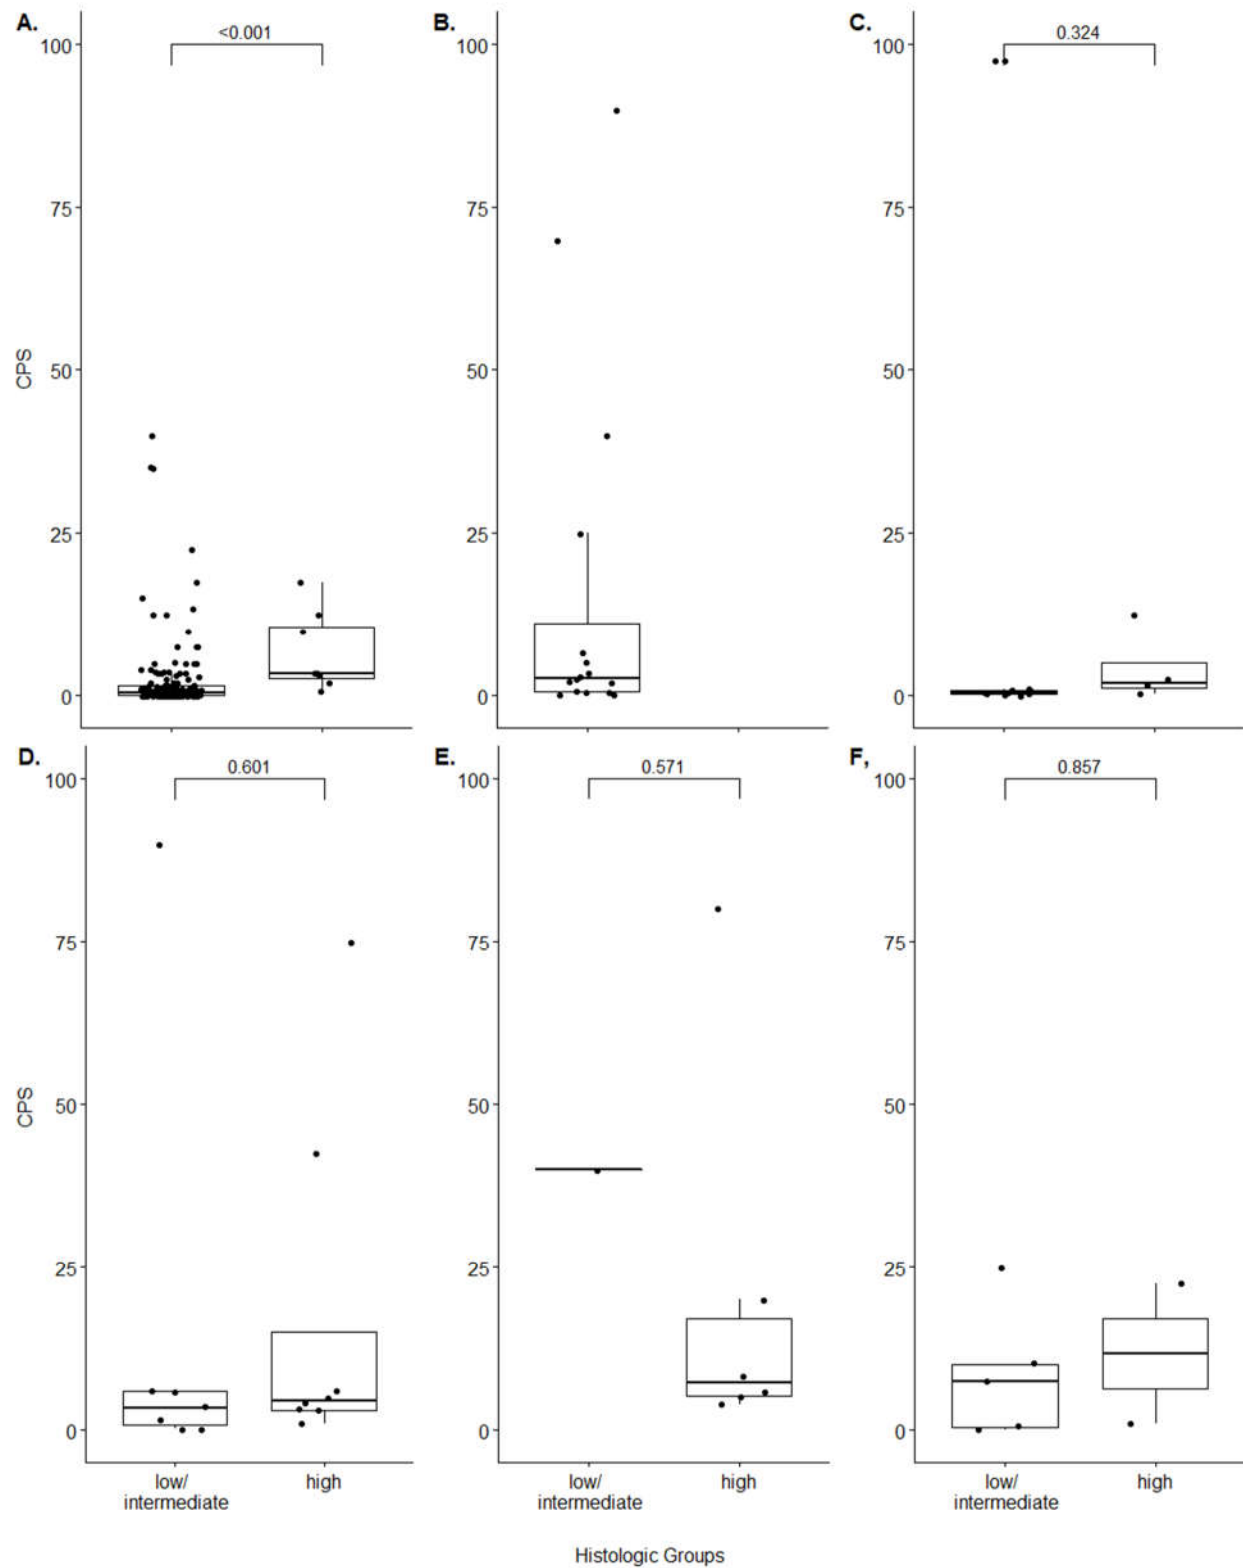

Supplement: Supplementary file 1 [file diagnostics-12-02340-s001.zip › diagnostics-1917100-supplementary.pdf]
